# Supplementary material for: Hormonal Effects of an Enzymatically Hydrolyzed Animal Protein-Based Biostimulant (Pepton) in Water-Stressed Tomato Plants
Source: PubMed Central journal article supplement (PMC6582703; doi:10.3389/fpls.2019.00758), 2019-06-12

**Supplementary Figure 1. Climatic conditions in greenhouse during the study.** Values are day mean of temperature (°C) and relative humidity (%) of measures recorded every 20 minutes.

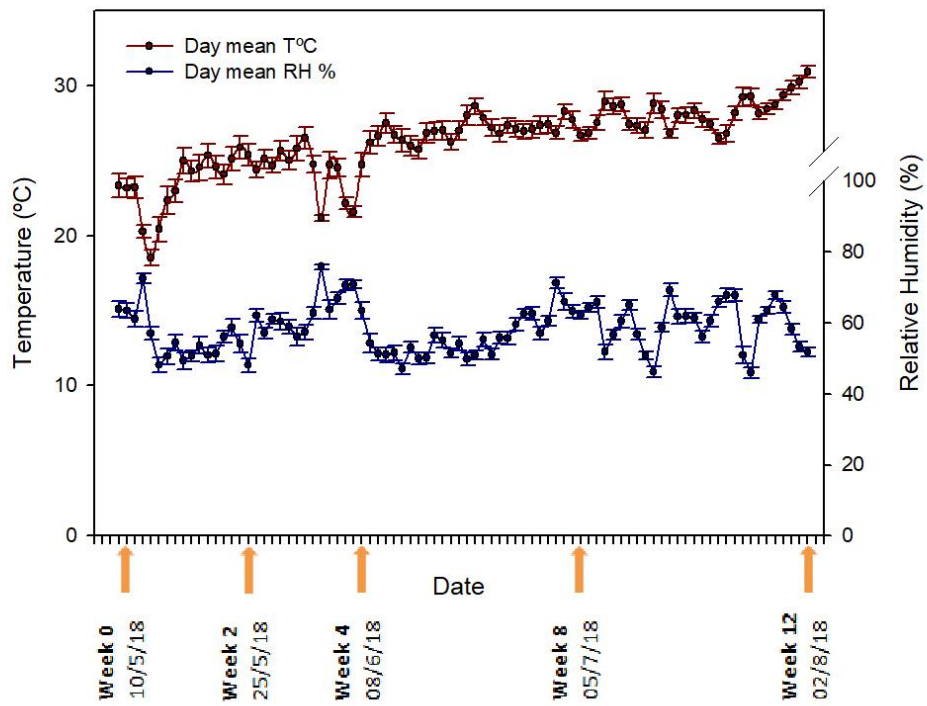

Supplement: Image_1.pdf [file Image_1.pdf]
