# Supplementary material for: Hormonal Effects of an Enzymatically Hydrolyzed Animal Protein-Based Biostimulant (Pepton) in Water-Stressed Tomato Plants
Source: PubMed Central journal article supplement (PMC6582703; doi:10.3389/fpls.2019.00758), 2019-06-12
Supplement: Image_2.pdf [file Image_2.pdf]

**Supplementary Figure 2. Phenotype of plants.** Mild water deficit in water-stressed plants caused reductions in growth, which was less apparent in Pepton-treated plants.

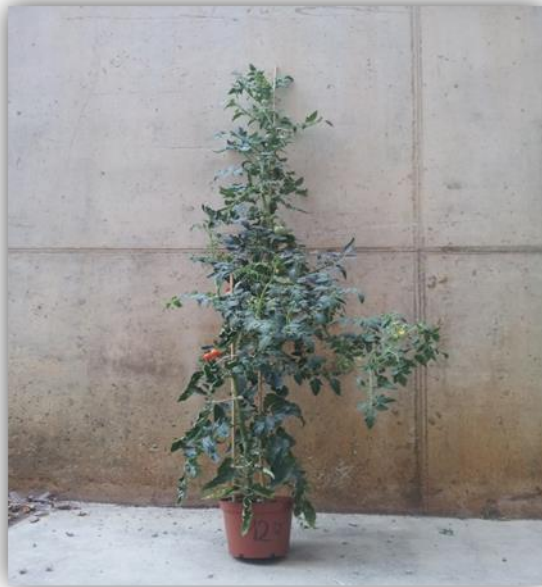

Well Watered -P

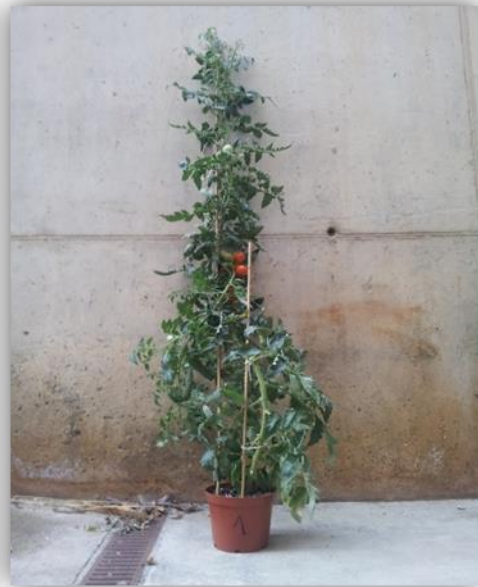

Well Watered +P

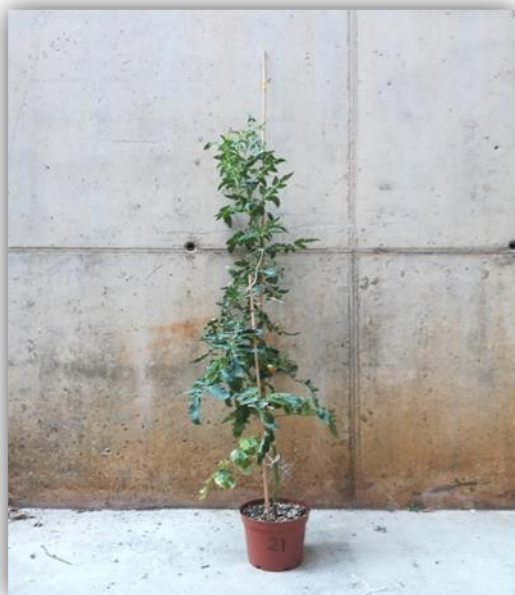

Water Stressed -P

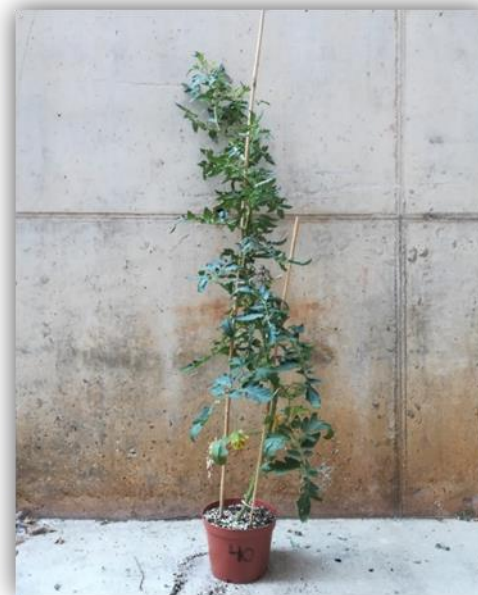

Water Stressed +P
