# Supplementary material for: Hormonal Effects of an Enzymatically Hydrolyzed Animal Protein-Based Biostimulant (Pepton) in Water-Stressed Tomato Plants
Source: PubMed Central journal article supplement (PMC6582703; doi:10.3389/fpls.2019.00758), 2019-06-12
Supplement: Table_1.pdf [file Table_1.pdf]

**Supplementary Table 1.** Typical chemical and amino acid composition of Pepton as reported by the manufacturer.

| <b>Pepton</b>                                   |       |
|-------------------------------------------------|-------|
| <b>Chemical composition</b>                     |       |
| Total organic matter, %                         | 79.0  |
| Total nitrogen, %                               | 13.0  |
| Organic nitrogen, %                             | 12.0  |
| Ammonia nitrogen, %                             | 1.0   |
| Ratio Carbon/Nitrogen                           | 3.8   |
| Potassium oxide (K <sub>2</sub> O), %           | 4.0   |
| Phosphorous (P <sub>2</sub> O <sub>5</sub> ), % | 0.3   |
| Calcium, ppm                                    | 300   |
| Magnesium, ppm                                  | 500   |
| Iron, ppm                                       | 3000  |
| <b>Amino acid composition</b>                   |       |
| Alanine, %                                      | 6.90  |
| Arginine, %                                     | 3.22  |
| Aspartic acid, %                                | 9.93  |
| Cysteine                                        | <0.1  |
| Glutamic acid, %                                | 7.25  |
| Glycine, %                                      | 4.06  |
| Histidine, %                                    | 6.34  |
| Isoleucine, %                                   | 0.15  |
| Leucine, %                                      | 10.99 |
| Lysine, %                                       | 7.19  |
| Methionine, %                                   | 0.71  |
| Phenylalanine, %                                | 5.93  |
| Proline, %                                      | 2.84  |
| Serine, %                                       | 3.88  |
| Threonine, %                                    | 2.47  |
| Tryptophan, %                                   | 1.25  |
| Tyrosine, %                                     | 1.92  |
| Valine, %                                       | 6.79  |
| Total amino acids, %                            | 84.83 |
| Free amino acids, %                             | 16.52 |
